# Supplementary material for: 349 看護学生の出産のイメージと母性意識の変化 : 自分の出生時のことを聞いて(学生教育1)(第45回日本母性衛生学会総会学術集会)
Source: Atypon-hosted journal article supplement (doi:10.1176/appi.psychotherapy.20190045), 2004-09-01
Supplement: appi.psychotherapy.20190045.ds001.pdf [file appi.psychotherapy.20190045.ds001.pdf]

Appendix 1. *Boolean Search Terms Used.*

|                                         |                                                                                                                                                                                                                                                                                                                                                                                                                                                                                                                                                                                                                                                                                                                                                                                                                                                                                                                                                                                                       |
|-----------------------------------------|-------------------------------------------------------------------------------------------------------------------------------------------------------------------------------------------------------------------------------------------------------------------------------------------------------------------------------------------------------------------------------------------------------------------------------------------------------------------------------------------------------------------------------------------------------------------------------------------------------------------------------------------------------------------------------------------------------------------------------------------------------------------------------------------------------------------------------------------------------------------------------------------------------------------------------------------------------------------------------------------------------|
| Acceptance and Commitment Therapy (ACT) | ("acceptance and commitment psychotherap*" OR "acceptance and commitment intervention" OR "acceptance and commitment therap*" OR "acceptance and commitment treatment" OR "acceptance commitment psychotherap*" OR "acceptance commitment intervention" OR "acceptance commitment therap*" OR "acceptance commitment treatment" OR "acceptance-commitment psychotherap*" OR "acceptance-commitment intervention" OR "acceptance-commitment therap*" OR "acceptance-commitment treatment" OR "ACT") Abstract ("acceptance and commitment psychotherap*" OR "acceptance and commitment intervention" OR "acceptance and commitment therap*" OR "acceptance and commitment treatment" OR "acceptance commitment psychotherap*" OR "acceptance commitment intervention" OR "acceptance commitment therap*" OR "acceptance commitment treatment" OR "acceptance-commitment psychotherap*" OR "acceptance-commitment intervention" OR "acceptance-commitment therap*" OR "acceptance-commitment treatment") |
| Applied Relaxation                      | ("applied relaxation psychotherap*" OR "applied relaxation intervention" OR "applied relaxation therap*" OR "applied relaxation treatment")                                                                                                                                                                                                                                                                                                                                                                                                                                                                                                                                                                                                                                                                                                                                                                                                                                                           |
| Attachment                              | ("attachment* psychotherap*" OR "attachment* intervention" OR "attachment* therap*" OR "attachment* treatment" OR "attachment based psychotherap*" OR "attachment based intervention" OR "attachment based therap*" OR "attachment based treatment")                                                                                                                                                                                                                                                                                                                                                                                                                                                                                                                                                                                                                                                                                                                                                  |
| Behavior Therapy (BT)                   | ("behavio* psychotherap*" OR "behavio* intervention" OR "behavio* therap*" OR "behavio* treatment")                                                                                                                                                                                                                                                                                                                                                                                                                                                                                                                                                                                                                                                                                                                                                                                                                                                                                                   |
| Cognitive Behavioral Therapy (CBT)      | ("cognitive behavio* psychotherap*" OR "cognitive behavio* intervention*" OR "cognitive behavio* therap*") OR ("cognitive behavio* treatment*" OR "cognitive-behavio* psychotherap*" OR "cognitive-behavio* intervention*" OR "cognitive-behavio* therap*" OR "cognitive-behavio* treatment*" OR "CBT")                                                                                                                                                                                                                                                                                                                                                                                                                                                                                                                                                                                                                                                                                               |
| Cognitive Therapy (CT)                  | ("cognitive psychotherap*" OR "cognitive intervention" OR "cognitive therap*" OR "cognitive treatment")                                                                                                                                                                                                                                                                                                                                                                                                                                                                                                                                                                                                                                                                                                                                                                                                                                                                                               |
| Compassion Focused Therapy (CFT)        | ("compassion-focused psychotherap*" OR "compassion-focused intervention" OR "compassion-focused therap*" OR "compassion-focused treatment" OR "compassion focused psychotherap*" OR "compassion focused intervention" OR "compassion focused therap*" OR "compassion focused treatment")                                                                                                                                                                                                                                                                                                                                                                                                                                                                                                                                                                                                                                                                                                              |
| Dialectical Behavior Therapy (DBT)      | ("dialectic* behavior psychotherap*" OR "dialectic* behavior intervention" OR "dialectic* behavior therap*" OR "dialectic*                                                                                                                                                                                                                                                                                                                                                                                                                                                                                                                                                                                                                                                                                                                                                                                                                                                                            |

|                                                      |                                                                                                                                                                                                                                                                                                                                                                                                                                                                                                                                                                               |
|------------------------------------------------------|-------------------------------------------------------------------------------------------------------------------------------------------------------------------------------------------------------------------------------------------------------------------------------------------------------------------------------------------------------------------------------------------------------------------------------------------------------------------------------------------------------------------------------------------------------------------------------|
|                                                      | behavior treatment” OR “dialectic*-behavior psychotherap*” OR “dialectic*-behavior intervention” OR “dialectic*-behavior therap*” OR “dialectic*-behavior treatment” OR “dialectic* behaviour psychotherap*” OR “dialectic* behaviour intervention” OR “dialectic* behaviour therap*” OR “dialectic* behaviour treatment” OR “dialectic*-behaviour psychotherap*” OR “dialectic*-behaviour intervention” OR “dialectic*-behaviour therap*” OR “dialectic*-behaviour treatment”)                                                                                               |
| Emotion-Focused Therapy (EFT)                        | (“emotion focused psychotherap*” OR “emotion focused intervention” OR “emotion focused therap*” OR “emotion focused treatment” OR “emotion-focused psychotherap*” OR “emotion-focused intervention” OR “emotion-focused therap*” OR “emotion-focused treatment”)                                                                                                                                                                                                                                                                                                              |
| Experiential/Gestalt                                 | (“experiential psychotherap*” OR “experiential intervention” OR “experiential therap*” OR “experiential treatment” OR “gestalt psychotherap*” OR “gestalt intervention” OR “gestalt therap*” OR “gestalt treatment”)                                                                                                                                                                                                                                                                                                                                                          |
| Exposure and Response Prevention (ERP)               | (“exposure and response prevention psychotherap*” OR “exposure and response prevention intervention” OR “exposure and response prevention therap*” OR “exposure and response prevention treatment” OR “exposure response prevention psychotherap*” OR “exposure response prevention intervention” OR “exposure response prevention therap*” OR “exposure response prevention treatment” OR “exposure-response prevention psychotherap*” OR “exposure-response prevention intervention” OR “exposure-response prevention therap*” OR “exposure-response prevention treatment”) |
| Eye Movement Desensitization and Reprocessing (EMDR) | (“eye movement desensitization and reprocessing psychotherap*” OR “eye movement desensitization and reprocessing intervention” OR “eye movement desensitization and reprocessing therap*” OR “eye movement desensitization and reprocessing treatment” OR “eye-movement desensitization and reprocessing psychotherap*” OR “eye-movement desensitization and reprocessing intervention” OR “eye-movement desensitization and reprocessing therap*” OR “eye-movement desensitization and reprocessing treatment” OR "EMDR")                                                    |
| Family Focused Therapy (FFT)                         | (“family-focused psychotherap*” OR “family-focused intervention” OR “family-focused therap*” OR “family-focused treatment” OR “family focused psychotherap*” OR “family focused intervention” OR “family focused therap*” OR “family focused treatment”)                                                                                                                                                                                                                                                                                                                      |
| Family Systems                                       | (“family system* psychotherap*” OR “family system* intervention” OR “family system* therap*” OR “family system* treatment” OR “family psychotherap*” OR “family intervention”                                                                                                                                                                                                                                                                                                                                                                                                 |

|                                         |                                                                                                                                                                                                                                                                                          |
|-----------------------------------------|------------------------------------------------------------------------------------------------------------------------------------------------------------------------------------------------------------------------------------------------------------------------------------------|
|                                         | OR "family therap*" OR "family treatment")                                                                                                                                                                                                                                               |
| Functional Analytic Psychotherapy (FAP) | ("functional analy* psychotherap*" OR "functional analy* treat*" OR "functional analy* program*" OR "functional analy* intervention" OR "FAP")                                                                                                                                           |
| Humanistic/Existential                  | ("humanistic psychotherap*" OR "humanistic intervention" OR "humanistic therap*" OR "humanistic treatment" OR "existential psychotherap*" OR "existential intervention" OR "existential therap*" OR "existential treatment")                                                             |
| Interpersonal (IPT)                     | ("interpersonal psychotherap*" OR "interpersonal intervention*" OR "interpersonal therap*" OR "interpersonal treatment" OR "IPT")                                                                                                                                                        |
| Meditation & Mindfulness                | (mindful* based OR mindful*- based OR "meditation psychotherap*" OR "meditation intervention" OR "meditation therap*" OR "meditation treatment" OR "mindful* psychotherap*" OR "mindful* based intervention" OR "mindful* based therap*" OR "mindful* based treatment")                  |
| Mentalization                           | ("mentalization psychotherap*" OR "mentalization intervention" OR "mentalization therap*" OR "mentalization treatment")                                                                                                                                                                  |
| Motivational Interviewing (MI)          | ("motivational interview* psychotherap*" OR "motivational interview* intervention" OR "motivational interview* therap*" OR "motivational interview* treatment")                                                                                                                          |
| Problem-Solving Therapy                 | ("problem-solv* psychotherap*" OR "problem-solv* intervention" OR "problem-solv* therap*" OR "problem-solv* treatment" OR "problem solv* psychotherap*" OR "problem solv* intervention" OR "problem solv* therap*" OR "problem solv* treatment")                                         |
| Prolonged Exposure (PE)                 | ("prolonged exposure psychotherap*" OR "prolonged exposure intervention" OR "prolonged exposure therap*" OR "prolonged exposure treatment" OR "prolonged-exposure psychotherap*" OR "prolonged-exposure intervention" OR "prolonged-exposure therap*" OR "prolonged-exposure treatment") |
| Psychoanalytic                          | ((("psychoanalysis")) OR ("psychoanal* psychotherap*") OR ("psychoanal* intervention") OR ("psychoanal* therap*") OR ("psychoanal* treatment"))                                                                                                                                          |
| Psychodynamic                           | ("psychodynamic psychotherap*" OR "psychodynamic intervention" OR "psychodynamic therap*" OR "psychodynamic treatment")                                                                                                                                                                  |
| Rational Emotive Behavior Therapy       | ("rational emotive psychotherap*" OR "rational emotive intervention" OR "rational emotive therap*" OR "rational emotive treatment" OR "rational-emotive psychotherap*" OR "rational-emotive intervention" OR "rational-emotive therap*" OR "rational-emotive treatment")                 |

|                              |                                                                                                                                                                                                                                                                                                          |
|------------------------------|----------------------------------------------------------------------------------------------------------------------------------------------------------------------------------------------------------------------------------------------------------------------------------------------------------|
| Rogerian/Person-centered     | (psychotherap* OR intervention* OR therap* OR treatment* OR program* OR manual* OR protocol*) AND (“Roger*” OR “person-centered” OR “person centered” OR “client centered” OR “client-centered” OR “patient centered” OR “patient-centered”)                                                             |
| Schema-Focused Therapy       | (“schema-focused psychotherap*” OR “schema-focused intervention” OR “schema-focused therap*” OR “schema-focused treatment” OR “schema focused psychotherap*” OR “schema focused intervention” OR “schema focused therap*” OR “schema focused treatment”)                                                 |
| Seeking Safety               | (“seeking safety psychotherap*” OR “seeking safety intervention” OR “seeking safety therap*” OR “seeking safety treatment”)                                                                                                                                                                              |
| Social Skills Training (SST) | (“social skill* psychotherap*” OR “social skill* intervention” OR “social skill* therap*” OR “social skill* treatment” OR “social-skill* psychotherap*” OR “social-skill* intervention” OR “social-skill* therap*” OR “social-skill* treatment”)                                                         |
| Transference-Focused Therapy | (“transference focused psychotherap*” OR “transference focused intervention” OR “transference focused therap*” OR “transference focused treatment” OR “transference-focused psychotherap*” OR “transference-focused intervention” OR “transference-focused therap*” OR “transference-focused treatment”) |
